# Supplementary material for: Impact of grain size on the optoelectronic performance of 2D Ruddlesden–Popper perovskite-based photodetectors
Source: Royal Society of Chemistry journal article supplement (doi:10.1039/d0tc04350h), 2020-11-23
Supplement: d0tc04350h1.pdf [file d0tc04350h1.pdf]

## **Supplementary Information**

### **Impact of grain sizes on optoelectronic performances of 2D Ruddlesden-Popper perovskite-based photodetectors**

*Bohee Hwang, Youngjun Park, and Jang-Sik Lee\**

Department of Materials Science and Engineering, Pohang University of Science and  
Technology (POSTECH), Pohang 37673, Korea

\*Corresponding Author. E-mail: [jangsik@postech.ac.kr](mailto:jangsik@postech.ac.kr)

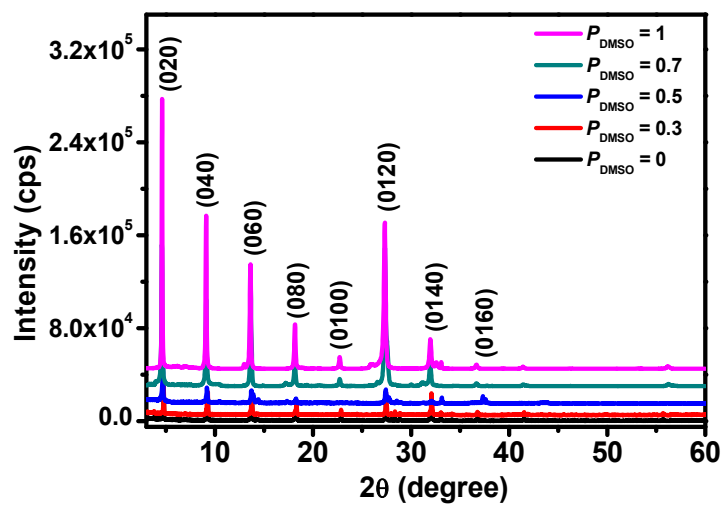

**Fig. S1.** X-ray diffraction patterns of the BA<sub>2</sub>MAPb<sub>2</sub>I<sub>7</sub> films that were cast from  $P_{\text{DMSO}} = 0$ , 0.3, 0.5, 0.7, and 1.

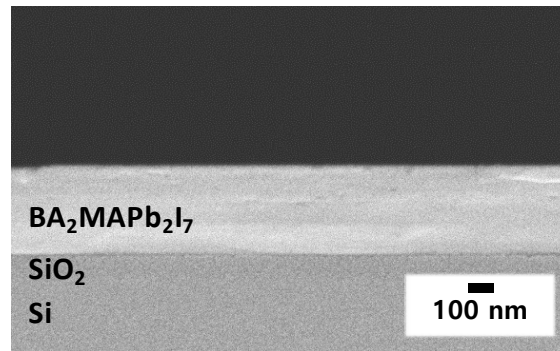

**Fig. S2.** Cross-sectional SEM image of the perovskite film that was formed using  $P_{\text{DMSO}} = 1$ .

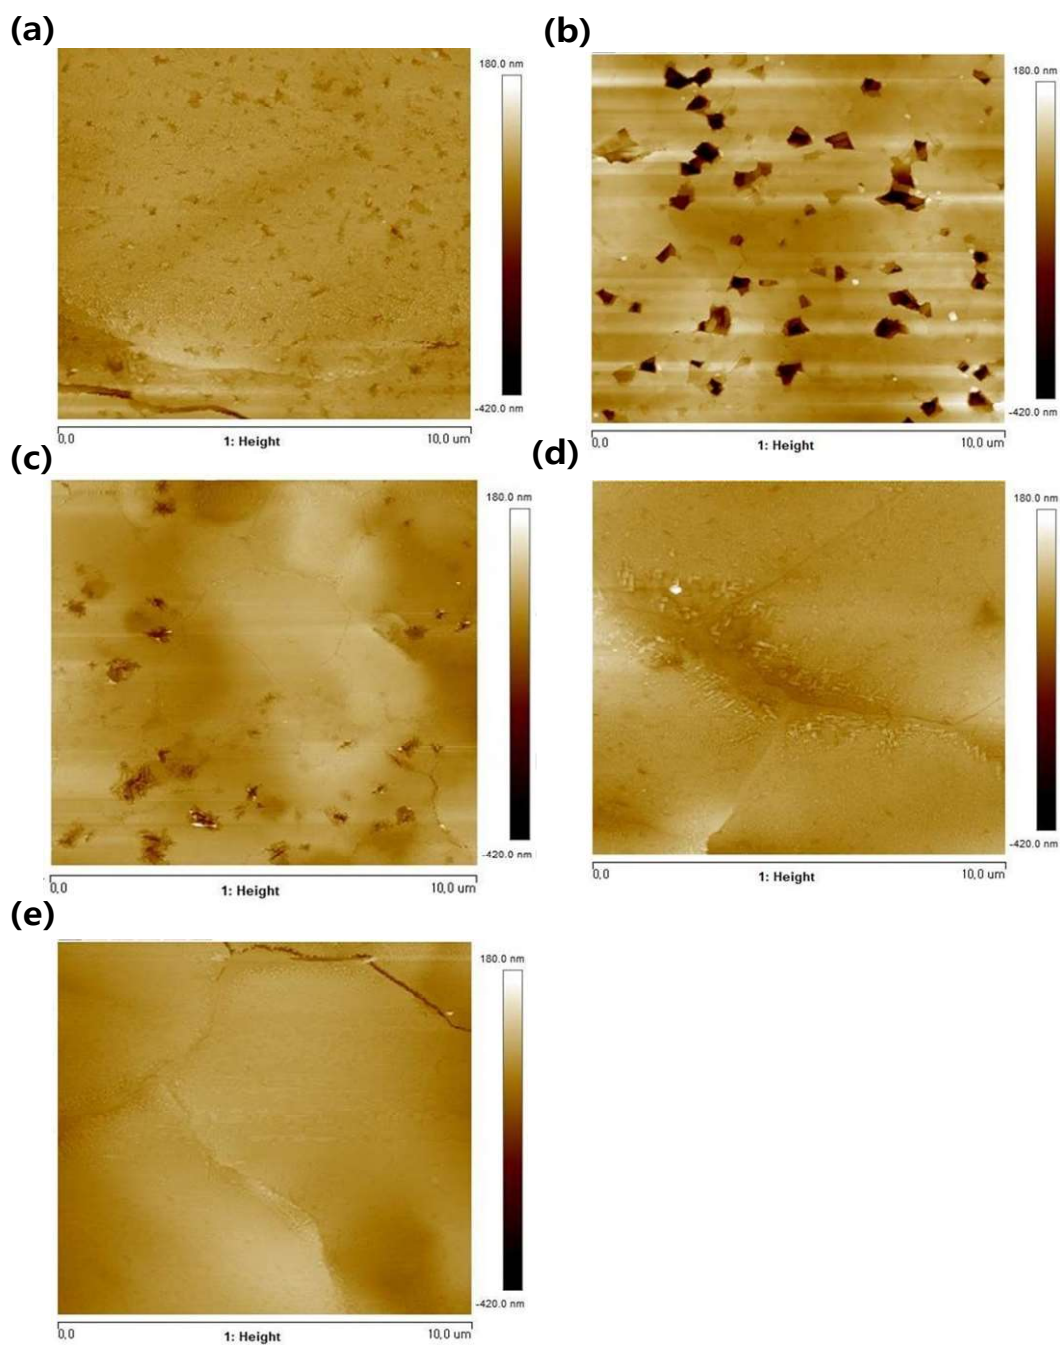

**Fig. S3.** Atomic force microscopy (AFM) images of the films that were cast from (a)  $P_{\text{DMSO}} = 0$ , (b)  $P_{\text{DMSO}} = 0.3$ , (c)  $P_{\text{DMSO}} = 0.5$ , (d)  $P_{\text{DMSO}} = 0.7$ , and (e)  $P_{\text{DMSO}} = 1$ .

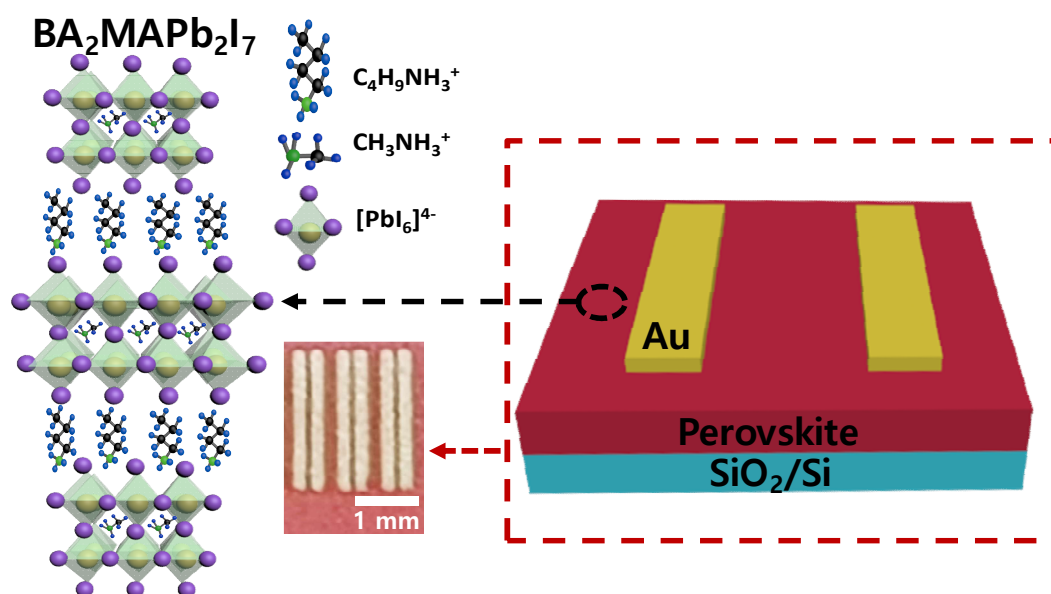

**Fig. S4.** Schematic illustration and optical image of fabricated photodetector device, and the structure of BA<sub>2</sub>MAPb<sub>2</sub>I<sub>7</sub> (atom colors: Pb = yellow; I = purple; C = black; N = green; H = blue).

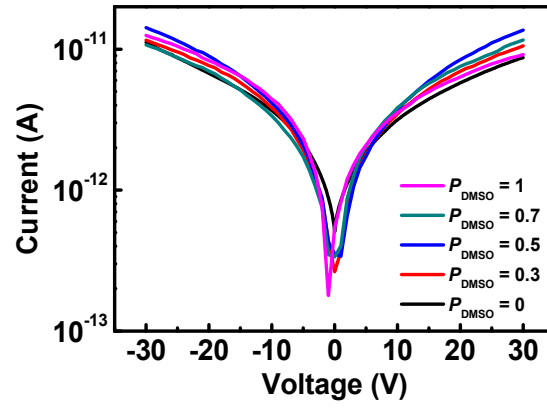

**Fig. S5.** (a)  $I$ - $V$  characteristics of the photodetectors based on  $P_{\text{DMSO}} = 0, 0.3, 0.5, 0.7$ , and 1 in darkness.

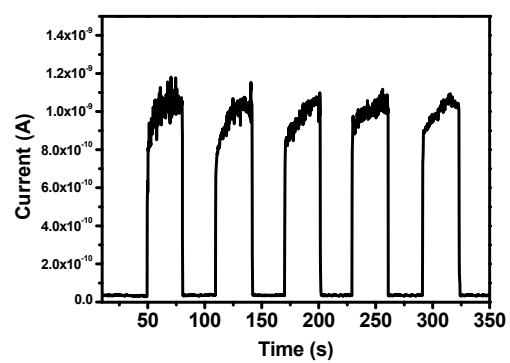

**Fig. S6.** Photoswitching characteristic at a bias of 5 V.

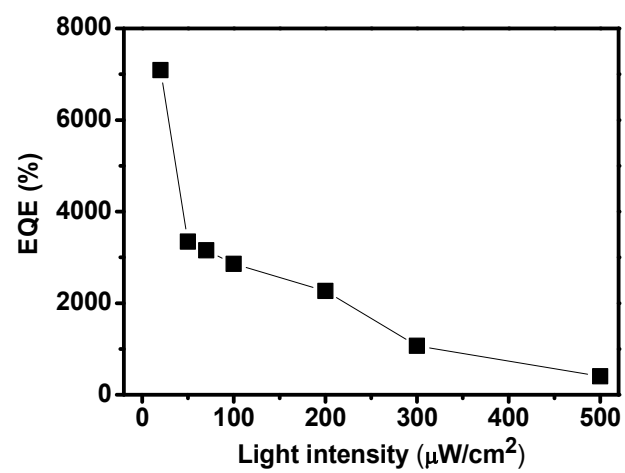

**Fig. S7.** EQE values according to light intensities.
